# Supplementary material for: Genetic Diversity, Analysis of Some Agro-Morphological and Quality Traits and Utilization of Plant Resources of Alfalfa
Source: MDPI journal article supplement (doi:10.3390/genes13091521), 2022-08-24
Supplement: s1 [file s1]

**Table S1.** Mean performance of plant height, number of tiller/ m2 and leaf /stem ratio of twenty-one alfalfa genotypes in first, second years and combined across the two years.

| Genotypes  | Plant Height (cm) |             |          | Number of Tiller/ m2 |             |          | Leaf /Stem Ratio |             |          |
|------------|-------------------|-------------|----------|----------------------|-------------|----------|------------------|-------------|----------|
|            | First Year        | Second Year | Combined | First Year           | Second Year | Combined | First Year       | Second Year | Combined |
| D32        | 46.81             | 49.78       | 48.3     | 253.78               | 266.67      | 260.23   | 1.368            | 1.583       | 1.476    |
| D47        | 51.98             | 54.79       | 53.58    | 276.63               | 289.52      | 283.08   | 1.436            | 1.651       | 1.544    |
| D89        | 46.44             | 49.25       | 47.85    | 246.74               | 259.63      | 253.19   | 1.357            | 1.572       | 1.465    |
| D95        | 50.38             | 53.19       | 53.39    | 272.56               | 285.45      | 279.06   | 1.422            | 1.637       | 1.531    |
| F11        | 43.21             | 45.92       | 44.57    | 237.05               | 249.94      | 243.50   | 1.114            | 1.325       | 1.220    |
| F18        | 58.62             | 60.78       | 59.70    | 326.34               | 335.23      | 330.79   | 1.571            | 1.785       | 1.678    |
| F26        | 45.25             | 47.96       | 46.61    | 240.49               | 253.38      | 246.94   | 1.241            | 1.456       | 1.349    |
| F28        | 52.22             | 54.93       | 53.67    | 279.60               | 292.49      | 286.05   | 1.454            | 1.669       | 1.562    |
| F49        | 56.03             | 58.74       | 57.98    | 318.04               | 330.93      | 324.49   | 1.644            | 1.859       | 1.752    |
| K42        | 44.47             | 46.35       | 45.91    | 238.77               | 251.66      | 245.22   | 1.151            | 1.366       | 1.259    |
| K75        | 52.87             | 55.75       | 54.78    | 305.18               | 318.07      | 311.63   | 1.522            | 1.735       | 1.629    |
| M3         | 46.65             | 49.23       | 48.09    | 249.69               | 262.58      | 256.14   | 1.368            | 1.583       | 1.476    |
| M9         | 42.67             | 45.55       | 44.11    | 228.12               | 241.01      | 234.57   | 1.426            | 1.211       | 1.319    |
| P5         | 53.48             | 56.36       | 57.39    | 312.75               | 325.64      | 319.20   | 1.548            | 1.763       | 1.656    |
| P13        | 53.34             | 56.22       | 54.92    | 309.43               | 322.32      | 315.88   | 1.531            | 1.746       | 1.639    |
| P20        | 52.23             | 55.11       | 53.71    | 297.45               | 310.34      | 303.90   | 1.456            | 1.671       | 1.564    |
| S4         | 40.55             | 43.43       | 41.99    | 232.74               | 245.63      | 239.19   | 1.231            | 1.016       | 1.124    |
| S5         | 49.93             | 52.81       | 51.79    | 268.34               | 281.23      | 274.79   | 1.418            | 1.633       | 1.526    |
| S6         | 49.62             | 52.50       | 51.37    | 265.54               | 278.43      | 271.99   | 1.392            | 1.607       | 1.501    |
| S12        | 47.67             | 50.55       | 49.11    | 258.88               | 271.77      | 265.33   | 1.387            | 1.602       | 1.495    |
| S35        | 52.27             | 55.15       | 54.31    | 301.84               | 314.73      | 308.29   | 1.465            | 1.675       | 1.570    |
| Mean       | 49.27             | 52.10       | 50.69    | 272.19               | 285.08      | 278.64   | 1.405            | 1.578       | 1.492    |
| F. test    | **                | **          | **       | **                   | **          | **       | **               | **          | **       |
| L.S.D 0.01 | 2.94              | 3.06        | 3.43     | 15.12                | 14.65       | 14.98    | 0.368            | 0.296       | 0.397    |
| L.S.D 0.05 | 1.85              | 1.97        | 2.34     | 13.41                | 11.76       | 12.35    | 0.123            | 0.142       | 0.201    |

\*\* Significant at 1% level of probability, L.S.D.: The least significant difference.

**Table S2.** Mean performance of total fresh and dry yields of twenty-one alfalfa genotypes in first, second years and combined across the two years.

| Genotypes | Total Fresh Yield<br>(ton/ fed) |             |          | Total Dry Yield<br>(ton/ fed) |             |          |
|-----------|---------------------------------|-------------|----------|-------------------------------|-------------|----------|
|           | First Year                      | Second Year | Combined | First Year                    | Second Year | Combined |
| D32       | 43.87                           | 46.57       | 45.22    | 8.91                          | 10.37       | 9.64     |
| D47       | 47.88                           | 50.58       | 49.23    | 9.49                          | 11.17       | 10.33    |
| D89       | 39.76                           | 42.46       | 41.11    | 7.95                          | 9.55        | 8.75     |
| D95       | 46.35                           | 49.01       | 47.68    | 9.19                          | 10.87       | 10.03    |
| F11       | 36.81                           | 39.51       | 38.16    | 7.28                          | 8.96        | 8.12     |
| F18       | 58.36                           | 61.03       | 59.70    | 13.58                         | 15.26       | 14.42    |
| F26       | 38.52                           | 41.29       | 39.91    | 7.62                          | 9.37        | 8.50     |
| F28       | 49.08                           | 51.78       | 50.43    | 9.73                          | 11.41       | 10.57    |
| F49       | 54.56                           | 57.26       | 55.91    | 10.83                         | 12.51       | 11.67    |
| K42       | 37.23                           | 39.93       | 38.58    | 7.97                          | 9.04        | 8.51     |
| K75       | 52.64                           | 55.34       | 53.99    | 10.44                         | 12.12       | 11.28    |
| M3        | 42.92                           | 44.73       | 43.83    | 8.32                          | 10.14       | 9.23     |

|            |       |       |       |       |       |       |
|------------|-------|-------|-------|-------|-------|-------|
| M9         | 35.55 | 37.36 | 36.46 | 6.85  | 8.53  | 7.69  |
| P5         | 54.88 | 56.69 | 55.79 | 11.71 | 13.39 | 12.55 |
| P13        | 54.36 | 56.17 | 55.27 | 10.91 | 12.59 | 11.75 |
| P20        | 50.96 | 52.74 | 51.85 | 9.92  | 11.60 | 10.76 |
| S4         | 34.45 | 36.26 | 35.36 | 6.62  | 7.91  | 7.27  |
| S5         | 46.67 | 48.48 | 47.58 | 9.83  | 11.25 | 10.54 |
| S6         | 45.32 | 47.13 | 46.23 | 8.84  | 10.48 | 9.66  |
| S12        | 45.28 | 47.09 | 46.19 | 8.79  | 10.47 | 9.63  |
| S35        | 51.12 | 52.93 | 52.03 | 9.96  | 11.64 | 10.80 |
| Mean       | 46.03 | 48.30 | 47.17 | 9.27  | 10.89 | 10.08 |
| F. test    | **    | **    | **    | **    | **    | **    |
| L.S.D 0.01 | 3.11  | 3.45  | 4.39  | 1.56  | 1.44  | 1.23  |
| L.S.D 0.05 | 2.67  | 2.98  | 3.25  | 0.41  | 0.32  | 0.45  |

\*\* Significant at 1% level of probability, L.S.D.: The least significant difference.

**Table S3.** Mean performances of quality traits of twenty-one genotypes of alfalfa in the first year.

| Genotypes  | Crude Protein % | Crude Fiber % | Ash%  |
|------------|-----------------|---------------|-------|
| D32        | 20.22           | 24.39         | 8.86  |
| D47        | 22.55           | 27.95         | 12.42 |
| D89        | 19.59           | 23.90         | 8.37  |
| D95        | 22.20           | 27.70         | 12.17 |
| F11        | 18.17           | 22.90         | 7.37  |
| F18        | 24.46           | 31.46         | 13.98 |
| F26        | 18.88           | 23.69         | 8.16  |
| F28        | 22.95           | 28.72         | 13.19 |
| F49        | 25.72           | 29.51         | 11.64 |
| K42        | 18.56           | 23.11         | 7.58  |
| K75        | 23.86           | 26.42         | 10.89 |
| M3         | 19.9            | 24.06         | 8.53  |
| M9         | 17.97           | 22.71         | 7.18  |
| P5         | 24.87           | 27.17         | 11.64 |
| P13        | 26.96           | 26.70         | 11.17 |
| P20        | 23.10           | 25.96         | 10.43 |
| S4         | 17.11           | 21.64         | 6.11  |
| S5         | 21.94           | 25.53         | 10.65 |
| S6         | 21.43           | 25.1          | 9.57  |
| S12        | 20.89           | 24.76         | 9.23  |
| S35        | 23.41           | 26.17         | 10.64 |
| Mean       | 21.65           | 25.69         | 9.69  |
| F. test    | **              | **            | **    |
| L.S.D 0.01 | 2.87            | 3.18          | 1.95  |
| L.S.D 0.05 | 1.54            | 2.31          | 1.06  |

\*\* Significant at 1% level of probability, L.S.D.: The least significant difference.
